# Supplementary material for: African Swine Fever Circulation among Free-Ranging Pigs in Sardinia: Data from the Eradication Program
Source: PubMed Central journal article supplement (PMC7563918; doi:10.3390/vaccines8030549), 2020-09-21
Supplement: vaccines-08-00549-s001.pdf [file vaccines-08-00549-s001.pdf]

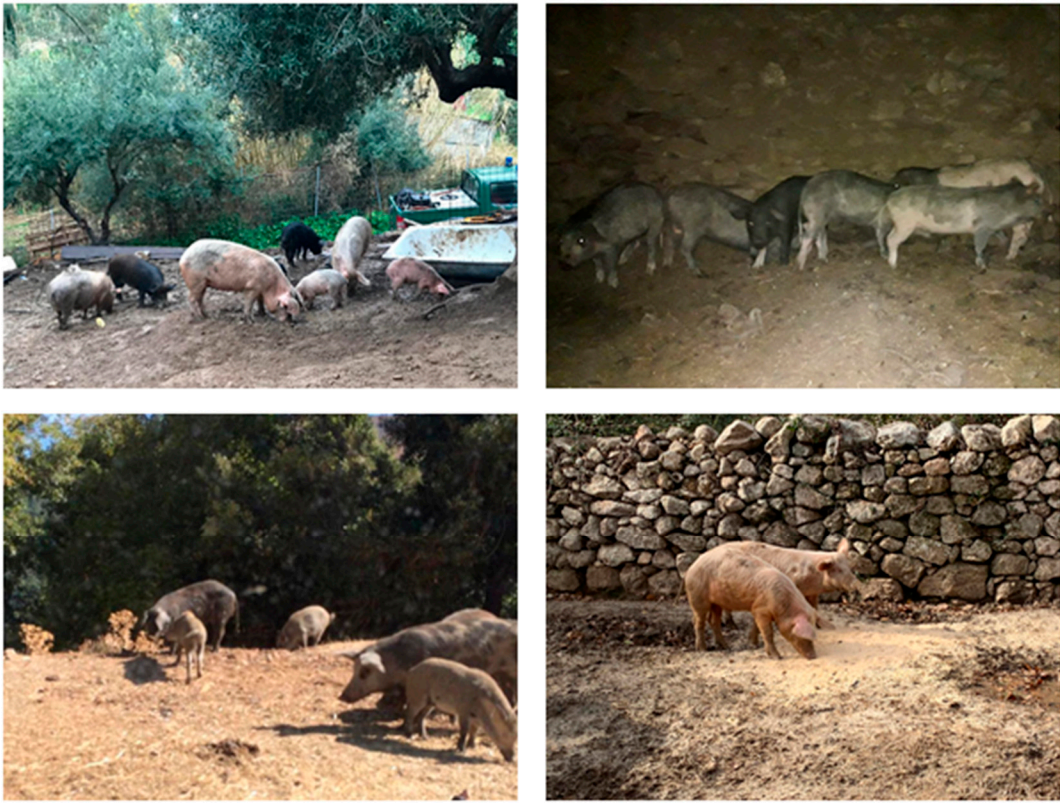

Figure S1. Images of apparently healthy free-ranging pigs (kindly provided by Dr. Sergio Masala, AHS).

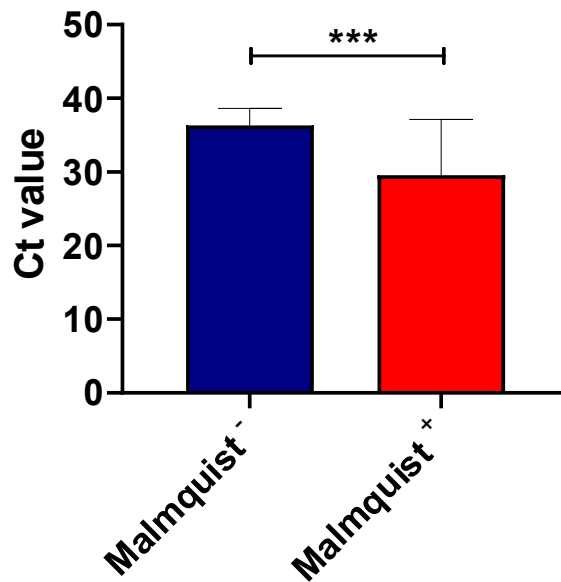

Figure S2. Threshold cycle values of real-time PCR+ free-ranging pig samples. Threshold cycle (Ct) values of Malmquist<sup>+</sup> and Malmquist<sup>-</sup> samples were compared using a student T test; \*\*\* p < 0.001. Mean values and SD are shown.

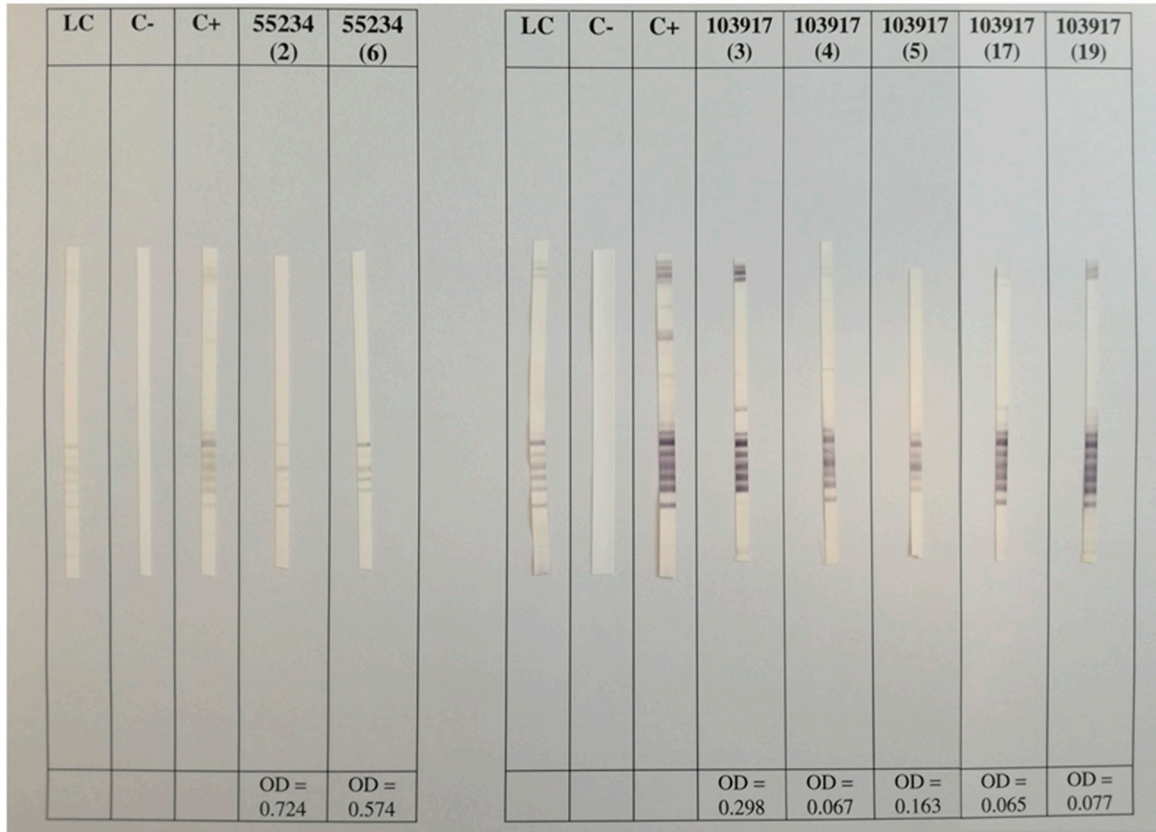

**Figure S3.** ASFV-antibodies of Malmquist+ free-ranging pigs. Immunoblotting strips incubated with the sera of the Malmquist+ free-ranging pigs culled in Desulo (55234) or Talana (103917), alongside positive (C+), negative (C-) and low positive (LC) controls.

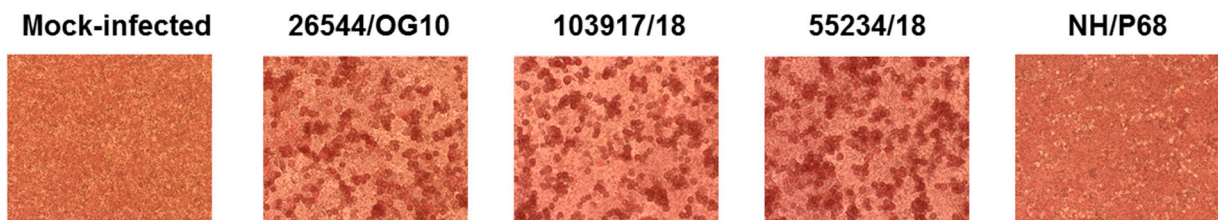

**Figure S4.** Haemoadsorbing effect of 103917/18 and 55234/18. Two days old monocytes were infected with the virulent HAD 26544/OG10, the two tested strains (103917/18 and 55234/18), and the non-HAD NH/P68, alongside mock-infected controls. Autologous erythrocytes were added to culture media; 24 hpi haemoadsorption effect was visible for 26544/OG10, 103917/18 and 55234/18.



|                              |       |                                 |                               |          |
|------------------------------|-------|---------------------------------|-------------------------------|----------|
| 140/Or/85                    | 1985  | Sardinia (Italy)                | Domestic pig                  | MN270972 |
| 139/Nu/81                    | 1981  | Sardinia (Italy)                | Domestic pig                  | MN270971 |
| 57/Ca/79                     | 1979  | Sardinia (Italy)                | Domestic pig                  | MN270970 |
| 56/Ca/78                     | 1978  | Sardinia (Italy)                | Domestic pig                  | MN270969 |
| BA71                         | 1971  | Spain                           | Domestic pig                  | NC044942 |
| BA71V                        |       | Spain                           | Tissue culture adapted (Vero) | U18466   |
| Benin 97/1                   | 1997  | Republic of Benin (West Africa) | Domestic pig                  | NC044956 |
| E75                          | 1975  | Spain                           | Domestic pig                  | NC044958 |
| L60                          | 1960  | Portugal                        | Domestic pig                  | NC044941 |
| NH/P68                       | 1968  | Portugal                        | Domestic pig                  | NC044943 |
| OUTR 88/3                    | 1988  | Portugal                        | Tick                          | NC044957 |
| Belgium/Etalle/wb/2018       | 2018  | Belgium                         | Wild Boar                     | MK543947 |
| Pig/HLJ/2018                 | 2018  | China                           | Domestic pig                  | MK333180 |
| ASFV-wbBS01                  | 2019? | China                           | Wild Boar                     | MK645909 |
| ASFV/pig/China/CAS19-01/2019 | 2019  | China                           | Domestic pig                  | MN172368 |
| Moldova 2017/1               | 2017  | Moldova                         | Wild Boar                     | LR722599 |
| ASFV/POL/2015/Podlaskie      | 2015  | Poland                          | Wild Boar                     | MH681419 |
| ASFV CzechRepublic 2017/1    | 2017  | Czech Republic                  | Wild Boar                     | LR722600 |
| Estonia 2014                 | 2014  | Estonia                         | Wild Boar                     | LS478113 |
| ASFV/LT14/1490               | 2014  | Lithuania                       | Wild Boar                     | MK628478 |
| ASFV Wuhan 2019-1            | 2019  | China                           | Domestic pig                  | MN393476 |
| Georgia 2007/1               | 2007  | Georgia                         | Domestic pig                  | NC044959 |
| Ken06.Bus                    | 2006  | Kenya                           | Domestic pig                  | NC044946 |
| Ken05/Tk1                    | 2005  | Kenya                           | Tick                          | NC044945 |
| Zaire                        | 1977  | Zaire                           | Domestic pig                  | MN630494 |
| RSA_2_2008                   | 2008  | South Africa                    | Tick                          | MN336500 |
| LIV_5_40                     | 1983  | Zambia                          | Tick                          | MN318203 |
| CN/2019/InnerMongolia-AES01  | 2019  | Mongolia                        | Wild Boar                     | MK940252 |
| Georgia 2008/2               | 2008  | Georgia                         | Domestic pig                  | MH910496 |
| Warthog                      | 1980  | Namibia                         | Warthog                       | AY261366 |
| Warmbaths                    | 1987  | Republic of South Africa        | Tick                          | AY261365 |
| Tengani 62                   | 1962  | Malawi                          | Domestic pig                  | AY261364 |
| Pretorisuskop/96/4           | 1996  | Republic of South Africa        | Tick                          | AY261363 |
| Mkuzi 1979                   | 1979  | Zululand                        | Tick                          | AY261362 |
| Malawi Lil-20-1 (1983)       | 1983  | Malawi                          | Tick                          | AY261361 |
| Kenya 1950                   | 1950  | Kenya                           | Domestic pig                  | AY261360 |

**Table S2.** Information on ASF virus+ free-ranging pigs, including municipality and month of the culling action, virological (tested organs, Ct values of real-time PCR, Malmquist) and serological (ELISA and immunoblotting) results.

| Culling action (location and month) | Identification number | Organ | Ct value* | Malmquist | ELISA | IB <sup>†</sup> |
|-------------------------------------|-----------------------|-------|-----------|-----------|-------|-----------------|
|-------------------------------------|-----------------------|-------|-----------|-----------|-------|-----------------|

|                                                  |             |                 |       |     |     |     |
|--------------------------------------------------|-------------|-----------------|-------|-----|-----|-----|
| Desulo<br>December 2017                          | 96355 (12)  | spleen          | 39.1  | neg | pos | pos |
|                                                  | 96355 (13)  | spleen          | 37.68 | neg | pos | pos |
|                                                  | 96355 (40)  | spleen          | 37.75 | neg | pos | pos |
|                                                  | 96355 (49)  | spleen          | 35.05 | neg | pos | pos |
| Arzana<br>December 2017                          | 96777 (1)   | spleen          | 38.54 | neg | pos | pos |
|                                                  | 96777 (8)   | spleen          | 35.85 | neg | neg | /   |
|                                                  | 96777 (16)  | spleen          | 33.39 | neg | neg | /   |
|                                                  | 96777 (18)  | spleen          | 33.37 | neg | pos | pos |
| Orgosolo (Montes)<br>December 2017               | 96804 (13)  | spleen          | 38.82 | neg | pos | pos |
| Villagrande Strisaili<br>December 2017           | 101337 (1)  | spleen          | 37.53 | neg | pos | pos |
|                                                  | 101337 (16) | spleen          | 38.59 | neg | pos | pos |
|                                                  | 101337 (17) | spleen          | 37.63 | neg | pos | pos |
|                                                  | 101337 (27) | spleen          | 38.04 | neg | neg | /   |
| Orgosolo (Pradu)<br>December 2017                | 103306 (39) | spleen          | 37.7  | neg | neg | /   |
| Orgosolo (Montes)<br>January 2018                | 2428 (48)   | spleen          | 37.8  | neg | neg | /   |
|                                                  | 2428 (81)   | spleen          | 37.63 | neg | pos | pos |
|                                                  | 2428 (84)   | spleen          | 37.4  | neg | pos | pos |
|                                                  | 2428 (102)  | spleen          | 35.49 | neg | pos | pos |
| Orgosolo (Montes)<br>January 2018                | 5703 (103)  | spleen          | 38.9  | neg | pos | pos |
|                                                  | 5703 (105)  | spleen          | 38.3  | neg | neg | /   |
| Orgosolo<br>(Biriddi - Iserrai) February<br>2018 | 18285 (19)  | spleen<br>lymph | 38.11 | neg | pos | pos |
|                                                  | 19185 (1)   | node            | 33.01 | neg | pos | pos |
|                                                  | 19185 (2)   | lymph<br>node   | 37.4  | neg | pos | pos |
| Desulo<br>June 2018                              | 55232 (2)   | spleen          | 37.33 | neg | pos | pos |
|                                                  | 55232 (6)   | spleen          | 32.68 | neg | pos | pos |
|                                                  | 55232 (9)   | spleen          | 34.86 | neg | pos | pos |
|                                                  | 55232 (10)  | spleen          | 37.85 | neg | pos | pos |
| Desulo<br>June 2018                              | 55234 (1)   | spleen          | 20.44 | pos | neg | /   |
|                                                  | 55234 (2)   | spleen          | 22.99 | pos | pos | pos |
|                                                  | 55234 (3)   | spleen          | 32.01 | neg | pos | pos |
|                                                  | 55234 (4)   | spleen          | 34.86 | neg | pos | pos |
|                                                  | 55234 (5)   | spleen          | 19.1  | pos | neg | /   |
|                                                  | 55234 (6)   | spleen          | 23.85 | pos | pos | pos |
|                                                  | 55234 (7)   | spleen          | 31.64 | neg | neg | /   |
|                                                  | 55234 (8)   | spleen          | 31.78 | neg | pos | pos |
|                                                  | 55234 (9)   | spleen          | 31.7  | neg | neg | /   |
|                                                  | 55234 (10)  | spleen          | 37.37 | neg | pos | pos |
|                                                  | 55234 (11)  | spleen          | 35.58 | neg | pos | neg |
| Talana<br>November 2018                          | 90280 (10)  | spleen          | 38.1  | neg | pos | pos |
|                                                  | 90280 (18)  | spleen          | 34.79 | neg | pos | pos |
|                                                  | 90350 (40)  | spleen          | 36.72 | neg | pos | pos |
| Villagrande (Luli)<br>November 2018              | 90307 (4)   | spleen          | 35.75 | neg | pos | pos |
| Villagrande (Carcaredda)<br>November 2018        | 90335 (10)  | spleen          | 37.93 | neg | pos | pos |
| Talana<br>December 2018                          | 103917 (3)  | spleen          | 27.14 | pos | pos | pos |
|                                                  | 103917 (4)  | spleen          | 34.84 | pos | pos | pos |
|                                                  | 103917 (5)  | spleen          | 36.67 | pos | pos | pos |

|                        |             |        |       |     |     |     |
|------------------------|-------------|--------|-------|-----|-----|-----|
|                        | 103917 (8)  | lung   | 33.14 | neg | pos | pos |
|                        | 103917 (14) | lung   | 37.98 | neg | pos | pos |
|                        | 103917 (16) | lung   | 35.8  | pos | neg | /   |
|                        | 103917 (17) | spleen | 36.95 | pos | pos | pos |
|                        | 103917 (19) | spleen | 37.98 | pos | pos | pos |
|                        | 103917 (20) | spleen | 39.3  | neg | pos | pos |
| Desulo<br>January 2019 | 13750 (1)   | spleen | 37.79 | neg | pos | pos |

\*Ct: threshold cycle; \*IB: immunoblotting; pos: positive; neg: negative; '/': not performed (IB was performed only on ELISA positive or inconclusive samples).
